# Supplementary material for: Clinical, Genetics, and Bioinformatic Characterization of Mutations Affecting an Essential Region of PLS3 in Patients with BMND18
Source: Int J Endocrinol. 2018 Oct 14;2018:8953217. doi: 10.1155/2018/8953217 (PMC6204236; doi:10.1155/2018/8953217)
Supplement: Supplementary Materials — We have two supplementary files. The supplementary word file contains three supplementary tables and two supplementary tables described in the text that support our results. Table S1: list of all the mutations on gene PLS3. Table S2: list of PDB templates used for segment-based homology modelling. Table S3: comparison of the hydrogen bonds formed by residues of LOOP-1 and CH2/CH3 domains in the wild-type and mutant (Glu249_Ala250ins12) plastin-3, respectively. Figure S1: the spine radiograph of the proband with the PLS3 (c.745 G > T) mutation. Figure S2: the ribbon rendering of the carbon backbone of the PLS3 core model (ABD1 and ABD2 are cyan and green, respectively) is shown within a semitransparent representation of the molecular surface. The supplementary excel file contains all the variants detected in the patient via focused exome sequencing. [file 8953217.f1.zip]

Archive with 2 entries (2 files):
- ALL the variants of the patient.xls
- mat.8953217.v2 (1).docx
